# Supplementary material for: GEMINI: Integrative Exploration of Genetic Variation and Genome Annotations
Source: PLoS Comput Biol. 2013 Jul 18;9(7):e1003153. doi: 10.1371/journal.pcbi.1003153 (PMC3715403; doi:10.1371/journal.pcbi.1003153)
Supplement: Table S1 — The GEMINI database schema. (XLSX) [file pcbi.1003153.s003.xlsx]

## Sheet: Variants Table
The Variants table
Documentation also available at: http://gemini.readthedocs.org/en/latest/content/database_schema.html#the-variants-table
		COLUMN NAME	COLUMN TYPE	DESCRIPTION
Core VCF Fields		chrom	STRING	The chromosome on which the variant resides
		start	INTEGER	The 0-based start position.
		end	INTEGER	The 1-based end position.
		variant_id	INTEGER	PRIMARY_KEY
		anno_id	INTEGER	Variant transcript number for the most severely affected transcript
		ref	STRING	Reference allele
		alt	STRING	Alternate alele for the variant
		qual	INTEGER	Quality score for the assertion made in ALT
		filter	STRING	A string of filters passed/failed in variant calling
Variant and population genetics info		type	STRING	The type of variant.
				Any of: [snp, indel]
		sub_type	STRING	The variant sub-type.
				If type is snp: [ts, (transition), tv (transversion)]
				If type is indel: [ins, (insertion), del (deletion)]
		call_rate	FLOAT	The fraction of samples with a valid genotype
		num_hom_ref	INTEGER	The total number of of homozygotes for the reference (ref) allele
		num_het	INTEGER	The total number of heterozygotes observed.
		num_hom_alt	INTEGER	The total number of homozygotes for the reference (alt) allele
		num_unknown	INTEGER	The total number of of unknown genotypes
		aaf	FLOAT	The observed allele frequency for the alternate allele
		hwe	FLOAT	The Chi-square probability of deviation from HWE (assumes random mating)
		inbreeding_coeff	FLOAT	The inbreeding co-efficient that expresses the likelihood of effects due to inbreeding
		pi	FLOAT	The computed nucleotide diversity (pi) for the site
Genotype Info.		gts	BLOB	A compressed binary vector of sample genotypes (e.g., “A/A”, “A|G”, “G/G”) Extracted from the VCF "GT" tag
		gt_types	BLOB	A compressed binary vector of numeric genotype “types” (e.g., 0, 1, 2) Inferred from the VCF "GT" tag
		gt_phases	BLOB	A compressed binary vector of sample genotype phases (e.g., False, True, False) Inferred from the VCF GT genotype tag’s allele delimiter: e.g., A/G means an unphased genotype. Value is FALSE. e.g., A|G means a phased genotype. Value is TRUE.
		gt_depths	BLOB	A compressed binary vector of the depth of aligned sequence observed for each sample Extracted from the VCF DP genotype tag.
		gt_ref_depths	BLOB	A compressed binary vector of the depth of reference alleles observed for each sample Extracted from the VCF AD genotype tag.
		gt_alt_depths	BLOB	A compressed binary vector of the depth of alternate alleles observed for each sample Extracted from the VCF AD genotype tag.
		gt_quals	BLOB	A compressed binary vector of the genotype quality (PHRED scale) estimates for each sample Extracted from the VCF GQ genotype tag.
Gene Information		gene	STRING	Corresponding gene name of the highly affected transcript
		transcript	STRING	The variant transcript that was most severely affected
				(for two equally affected transcripts, either the first one is selected (VEP) or protein_coding biotype considered (snpEff).
		is_exonic	BOOL	Does the variant affect an exon for >= 1transcript?
		is_coding	BOOL	Does the variant fall in a coding region (excl. 3’ & 5’ UTRs) for >= 1 transcript?
		is_lof	BOOL	Based on the value of the impact col, is the variant LOF for >= transcript?
		exon	STRING	Exon information for the severely affected transcript
		codon_change	STRING	What is the codon change?
		aa_change	STRING	What is the amino acid change (for an snp)?
		aa_length	STRING	The length of CDS in terms of number of amino acids (only snpEff)
		biotype	STRING	The ‘type’ of the severely affected transcript (e.g.protein-coding, pseudogene, rRNA etc.) (only snpEff)
		impact	STRING	The consequence of the most severely affected transcript
		impact_severity	STRING	Severity of the highest order observed for the variant
		polyphen_pred	STRING	Polyphen predictions for the snps for the severely affected transcript (only VEP)
		polyphen_score	FLOAT	Polyphen scores for the severely affected transcript (only VEP)
		sift_pred	STRING	SIFT predictions for the snp’s (VEP only) for the most severely affected transcript (only VEP)
		sift_score	FLOAT	SIFT scores for the predictions (only VEP)
		pfam_domain	STRING	Pfam protein domain that the variant affects
Optional VCF INFO fields		anc_allele	STRING	The reported ancestral allele if there is one.
		rms_bq	FLOAT	The RMS base quality at this position.
		cigar	STRING	CIGAR string describing how to align an alternate allele to the reference allele.
		depth	INTEGER	The number of aligned sequence reads that led to this variant call
		strand_bias	FLOAT	Strand bias at the variant position
		rms_map_qual	FLOAT	RMS mapping quality, a measure of variance of quality scores
		in_hom_run	INTEGER	Homopolymer runs for the variant allele
		num_mapq_zero	INTEGER	Total counts of reads with mapping quality equal to zero
		num_alleles	INTEGER	Total number of alleles in called genotypes
		num_reads_w_dels	FLOAT	Fraction of reads with spanning deletions
		haplotype_score	FLOAT	Consistency of the site with two segregating haplotypes
		qual_depth	FLOAT	Variant confidence or quality by depth
		allele_count	INTEGER	Allele counts in genotypes
		allele_bal	FLOAT	Allele balance for hets
		is_somatic	BOOL	Whether the variant is somatically acquired.
Population Frequency information		in_dbsnp	BOOL	Is this variant found in dbSnp (build 135)?
				0 : Absence of the variant in dbsnp
				1 : Presence of the variant in dbsnp
		rs_ids	STRING	A comma-separated list of rs ids for variants present in dbsnp
		in_hm2	BOOL	Whether the variant was part of HapMap2.
		in_hm3	BOOL	Whether the variant was part of HapMap3.
		in_esp	BOOL	Presence/absence of the variant in the ESP project data
		in_1kg	BOOL	Presence/absence of the variant in the 1000 genome project data
		aaf_esp_ea	FLOAT	Minor Allele Frequency of the variant for European Americans in the ESP project
		aaf_esp_aa	FLOAT	Minor Allele Frequency of the variant for African Americans in the ESP project
		aaf_esp_all	FLOAT	Minor Allele Frequency of the variant w.r.t both groups in the ESP project
		aaf_1kg_amr	FLOAT	Allele Frequency of the variant for samples in AMR based on AC/AN (1000g project)
		aaf_1kg_asn	FLOAT	Allele frequency of the variant for samples in ASN based on AC/AN (1000g project)
		aaf_1kg_afr	FLOAT	Allele frequency of the variant for samples in AFR based on AC/AN (1000g project)
		aaf_1kg_eur	FLOAT	Allele Frequency of the variant for samples in EUR based on AC/AN (1000g project)
		aaf_1kg_all	FLOAT	Global allele frequency (based on AC/AN) (1000g project)
Disease Phenotype Information		in_omim	BOOL	0 : Absence of the variant in OMIM database
				1 : Presence of the variant in OMIM database
		clinvar_sig	STRING	The clinical significance scores for each
				of the variant according to ClinVar:
				unknown, untested, non-pathogenic
				probable-non-pathogenic, probable-pathogenic
				pathogenic, drug-response, histocompatibility
				other
		clinvar_disease_name	STRING	The name of the disease to which the variant is relevant
		clinvar_dbsource	STRING	Variant Clinical Channel IDs
		clinvar_dbsource_id	STRING	The record id in the above database
		clinvar_origin	STRING	The type of variant.
				Any of:
				unknown, germline, somatic,
				inherited, paternal, maternal,
				de-novo, biparental, uniparental,
				not-tested, tested-inconclusive,
				other
		clinvar_dsdb	STRING	Variant disease database name
		clinvar_dsdbid	STRING	Variant disease database ID
		clinvar_disease_acc	STRING	Variant Accession and Versions
		clinvar_in_locus_spec_db	BOOL	Submitted from a locus-specific database?
		clinvar_on_diag_assay	BOOL	Variation is interrogated in a clinical diagnostic assay?
Genome Annotations		exome_chip	BOOL	Whether an SNP is on the Illumina HumanExome Chip
		cyto_band	STRING	Chromosomal cytobands that a variant overlaps
		rmsk	STRING	A comma-separated list of RepeatMasker annotations that the variant overlaps.
				Each hit is of the form: name_class_family
		in_cpg_island	BOOL	Does the variant overlap a CpG island?.
				Based on UCSC: Regulation > CpG Islands > cpgIslandExt
		in_segdup	BOOL	Does the variant overlap a segmental duplication?.
				Based on UCSC: Variation&Repeats > Segmental Dups > genomicSuperDups track
		is_conserved	BOOL	Does the variant overlap a conserved region?
				Based on the 29-way mammalian conservation study
		gerp_bp_scpre	FLOAT	GERP conservation score.
				Only populated if the --load-gerp-bp option is used when loading.
				Higher scores reflect greater conservation. At base-pair resolution.
				Details: http://mendel.stanford.edu/SidowLab/downloads/gerp/
		gerp_element_pval	FLOAT	GERP elements P-val
				Lower P-values scores reflect greater conservation. Not at base-pair resolution.
				Details: http://mendel.stanford.edu/SidowLab/downloads/gerp/
		recomb_rate	FLOAT	Returns the mean recombination rate at the variant site
				Based on HapMapII_GRCh37 genetic map
Functional annotations from ENCODE		grc	STRING	Association with patch and fix regions from the Genome Reference Consortium:
				http://www.ncbi.nlm.nih.gov/projects/genome/assembly/grc/human/
				Identifies potential problem regions associated with variant calls.
				Built with annotation_provenance/make-ncbi-grc-patches.py
		gms_illumina	FLOAT	Genome Mappability Scores (GMS) for Illumina error models
				Provides low GMS scores (< 25.0 in any technology) from:
				http://sourceforge.net/apps/mediawiki/gma-bio/index.php?title=Download_GMS
				#Download_GMS_by_Chromosome_and_Sequencing_Technology
				Input VCF for annotations prepared with:
				https://github.com/chapmanb/bcbio.variation/blob/master/src/bcbio/variation/utils/gms.clj
		gms_solid	FLOAT	Genome Mappability Scores with SOLiD error models
		gms_iontorrent	FLOAT	Genome Mappability Scores with IonTorrent error models
		encode_tfbs	STRING	Comma-separated list of transcription factors that were
				observed by ENCODE to bind DNA in this region. Each hit in the list is constructed
				as TF_CELLCOUNT, where:
				TF is the transcription factor name
				CELLCOUNT is the number of cells tested that had nonzero signals.
				Provenance: wgEncodeRegTfbsClusteredV2 UCSC table
		encode_dnaseI_cell_count	INTEGER	Count of cell types that were observed to have DnaseI hypersensitivity.
		encode_dnaseI_cell_list	STRING	Comma separated list of cell types that were observed to have DnaseI hypersensitivity.
				Provenance: Thurman, et al, Nature, 489, pp. 75-82, 5 Sep. 2012
		encode_consensus_gm12878	STRING	ENCODE consensus segmentation prediction for GM12878.
				CTCF: CTCF-enriched element
				E: Predicted enhancer
				PF: Predicted promoter flanking region
				R: Predicted repressed or low-activity region
				TSS: Predicted promoter region including TSS
				T: Predicted transcribed region
				WE: Predicted weak enhancer or open chromatin cis-regulatory element | unknown: This region of the genome had no functional prediction.
		encode_consensus_h1hesc	STRING	ENCODE consensus segmentation prediction for h1HESC. See encode_consseg_gm12878 for details.
		encode_consensus_helas3	STRING	ENCODE consensus segmentation prediction for Helas3. See encode_consseg_gm12878 for details.
		encode_consensus_hepg2	STRING	ENCODE consensus segmentation prediction for HEPG2. See encode_consseg_gm12878 for details.
		encode_consensus_huvec	STRING	ENCODE consensus segmentation prediction for HuVEC. See encode_consseg_gm12878 for details.
		encode_consensus_k562	STRING	ENCODE consensus segmentation prediction for k562. See encode_consseg_gm12878 for details.

## Sheet: Variant Impacts Table
The Variant_impacts table
Documentation also available at: http://gemini.readthedocs.org/en/latest/content/database_schema.html#the-variant-impacts-table
COLUMN NAME	COLUMN TYPE	DESCRIPTION
variant_id	INTEGER	PRIMARY_KEY (Foreign key to variants table)
anno_id	INTEGER	PRIMARY_KEY (Based on variant transcripts)
gene	STRING	The gene affected by the variant.
transcript	STRING	The transcript affected by the variant.
is_exonic	BOOL	Does the variant affect an exon for this transcript?
is_coding	BOOL	Does the variant fall in a coding region (excludes 3’ & 5’ UTR’s of exons)?
is_lof	BOOL	Based on the value of the impact col, is the variant LOF?
exon	STRING	Exon information for the variants that are exonic
codon_change	STRING	What is the codon change?
aa_change	STRING	What is the amino acid change?
aa_length	STRING	The length of CDS in terms of number of amino acids (only snpEff)
biotype	STRING	The type of transcript (e.g.protein-coding, pseudogene, rRNA etc.) (only snpEff)
impact	STRING	Impacts due to variation (ref.impact category)
impact_severity	STRING	Severity of the impact based on the impact column value (ref.impact category)
polyphen_pred	STRING	Impact of the SNP as given by PolyPhen (only VEP)
		(benign, possibly_damaging, probably_damaging, unknown)
polyphen_scores	FLOAT	Polyphen score reflecting severity (higher the impact, higher the score) (only VEP)
sift_pred	STRING	Impact of the SNP as given by SIFT (only VEP)
		(neutral, deleterious)
sift_scores	FLOAT	SIFT prob. scores reflecting severity (Higher the impact, lower the score) (only VEP)

## Sheet: Samples Table
The Samples table
Documentation also available at: http://gemini.readthedocs.org/en/latest/content/database_schema.html#the-samples-table
COLUMN NAME	COLUMN TYPE	DESCRIPTION
sample_id	INTEGER	PRIMARY_KEY
name	STRING	Sample names
family_id	INTEGER	Family ids for the samples [User defined, default: NULL]
paternal_id	INTEGER	Paternal id for the samples [User defined, default: NULL]
maternal_id	INTEGER	Maternal id for the samples [User defined, default: NULL]
sex	STRING	Sex of the sample [User defined, default: NULL]
phenotype	STRING	The associated sample phenotype [User defined, default: NULL]
ethnicity	STRING	The ethnic group to which the sample belongs [User defined, default: NULL]

## Sheet: Resources Table
The Resources table
Documentation also available at: https://gemini.readthedocs.org/en/latest/content/database_schema.html#the-resources-table
COLUMN NAME	COLUMN TYPE	DESCRIPTION
name	STRING	Name of the annotation type
resource	STRING	Filename of the resource, with version information

## Sheet: Version Table
The Resources table
Documentation also available at: https://gemini.readthedocs.org/en/latest/content/database_schema.html#the-version-table
COLUMN NAME	COLUMN TYPE	DESCRIPTION
version	STRING	What version of gemini was used to create the DB.
